1 **Two tandem mechanisms control bimodal expression of the flagellar genes in *Salmonella***  
2 ***enterica***

3

4 Xiaoyi Wang<sup>1,2</sup>, Santosh Koirala<sup>1</sup>, Phillip D. Aldridge<sup>3</sup>, and Christopher V. Rao<sup>1,2\*</sup>

5

6 1: Department of Chemical and Biomolecular Engineering, 2: Carl R. Woese Institute for  
7 Genomics Biology, University of Illinois at Urbana-Champaign, Urbana, Illinois, United States,  
8 61801

9

10 3: Centre for Bacterial Cell Biology, Newcastle University, Newcastle upon Tyne, United Kingdom.

11

12 \*Corresponding author. Department of Chemical and Biomolecular Engineering. University of  
13 Illinois at Urbana-Champaign, 600 S. Mathews Ave, Urbana, IL, United States, 61810. Phone:  
14 (217) 244-2247. Fax: (217) 333-5052. Email: [chris@scs.uiuc.edu](mailto:chris@scs.uiuc.edu).

15

16 **Running title:** Bimodal flagellar gene expression.

17

18 **ABSTRACT**

19 Flagellar gene expression is bimodal in *Salmonella enterica*. Under certain growth conditions,  
20 some cells express the flagellar genes whereas others do not. This results in mixed populations  
21 of motile and non-motile cells. In the present study, we found that two independent mechanisms  
22 control bimodal expression of the flagellar genes. One was previously found to result from a  
23 double negative-feedback loop involving the flagellar regulators YdiV and FlhZ. This feedback loop  
24 governs bimodal expression of class 2 genes. In this work, a second mechanism was found to  
25 govern bimodal expression of class 3 genes. In particular, class 3 gene expression is still bimodal  
26 even when class 2 gene expression is not. Using a combination of experimental and modeling  
27 approaches, we found that class 3 bimodality results from the  $\sigma^{28}$ -FlgM developmental checkpoint.

28

29 **IMPORTANCE**

30 Many bacterial use flagella to swim in liquids and swarm over surface. In *Salmonella enterica*,  
31 over fifty genes are required to assemble flagella. The expression of these genes is tightly  
32 regulated. Previous studies have found that flagella gene expression is bimodal in *S. enterica*,  
33 which means that only a fraction of cells express flagellar genes and are motile. In the present  
34 study, we found that two separate mechanisms induce this bimodal response. One mechanism,  
35 which was previously identified, tunes the fraction of motile cells in response to nutrients. The  
36 other results from a developmental checkpoint that couples flagellar gene expression to flagellar  
37 assembly. Collectively, these results further our understanding of how flagellar gene expression  
38 is regulated in *S. enterica*.

39

40

## 41 INTRODUCTION

42 Many bacteria can switch between motile and non-motile states. Food is often a key factor in  
43 determining whether these bacteria are motile or not. For example, many bacteria are motile only  
44 when grown in nutrient-limited media; others are motile only when grown in nutrient-rich media.  
45 *Salmonella enterica* is an example of the latter. This bacterium employs flagella to swim in liquids  
46 (1). Previous studies have shown that nutrients induce the expression of the flagellar genes in *S.*  
47 *enterica* (2). The individual bacteria, however, do not all respond the same to nutrients. Rather,  
48 nutrients tune the relative fraction of motile and non-motile cells within the population (3). These  
49 mixed populations indicate that the response to nutrients is bimodal, where two otherwise identical  
50 cells can exhibit an entirely different response to the same nutrient concentrations.

51 Multiple studies have observed bimodal expression of the flagellar genes in *S. enterica* (3-9).  
52 As a brief background, the flagellar promoters can be grouped into three hierarchical classes  
53 based on how they are temporally activated (10, 11). A single class 1 promoter controls the  
54 expression of the master flagellar regulator, the FlhD<sub>4</sub>C<sub>2</sub> complex (12). FlhD<sub>4</sub>C<sub>2</sub> in turn activates  
55 class 2 promoters (13). These promoters control the expression of the genes encoding the hook-  
56 basal-body (HBB) proteins and two key regulators. One is the alternate sigma factor  $\sigma^{28}$  (FliA),  
57 which activates expression of the class 3 promoters. These promoters control expression of the  
58 genes encoding the filament, motor, and chemotaxis proteins (14). The other is the anti-sigma  
59 factor FlgM (15). Prior to completion of the HBB, FlgM binds  $\sigma^{28}$  and prevents it from activating  
60 class 3 promoters. Upon completion of the HBB, FlgM is secreted from the cell, freeing  $\sigma^{28}$  to  
61 activate class 3 promoters (16). This mechanism provides a developmental checkpoint, ensuring  
62 that class 3 genes are expressed only when functional HBB's are built. It is also thought to provide  
63 a sensing mechanism enabling *S. enterica* to control flagellar abundance (17-21).

64 A number of additional flagellar proteins are known to regulate flagellar gene expression in *S.*  
65 *enterica* (18, 22-25). In the context of this study, Koirala and coworkers (3) previously  
66 demonstrated that a double-negative feedback loop involving two regulatory proteins, FliZ and

67 YdiV, governs bimodal expression of class 2 genes in response to nutrients. YdiV represses class  
68 2 and 3 gene expression by binding to the FlhD subunit of the FlhD<sub>4</sub>C<sub>2</sub> complex and then  
69 promoting its degradation by the protease ClpXP (2, 26). In addition, YdiV prevents the FlhD<sub>4</sub>C<sub>2</sub>  
70 complex from binding to and activating class 2 promoters (2, 26). YdiV also governs the nutrient  
71 response: nutrients inhibit expression of YdiV by an unknown mechanism (2). When nutrient  
72 concentrations are high, YdiV expression is low, thus freeing FlhD<sub>4</sub>C<sub>2</sub> to activate class 2  
73 promoters. Conversely, when nutrients concentrations are low, YdiV expression is high, thus  
74 preventing FlhD<sub>4</sub>C<sub>2</sub> from activating class 2 promoters. FliZ, expressed from the hybrid class 2/3  
75 *fliAZ* promoter, activates class 2 and 3 gene expression by inhibiting expression of YdiV, at both  
76 the transcriptional and translational level (3, 27). YdiV and FliZ participate in a double-feedback  
77 loop, where YdiV indirectly represses expression of FliZ through FlhD<sub>4</sub>C<sub>2</sub>, and FliZ directly  
78 represses expression of YdiV (27). As a consequence, two stable expression states are possible:  
79 one where YdiV concentrations are high and FliZ concentrations are low; and the other where  
80 YdiV concentrations are low and FliZ concentrations are high. In support of this mechanism, only  
81 a single expression state (i.e. monostable expression) for class 2 genes is observed when this  
82 feedback loop is broken, for example by deleting *fliZ* or *ydiV* (3).

83 A separate mechanism appears to govern bimodal expression of class 3 genes in *S. enterica*,  
84 because class 3 gene expression is still bimodal in a  $\Delta$ *fliZ* mutant (5, 8). While these previous  
85 studies did not investigate the nutrient response per se, they nonetheless demonstrated that the  
86 YdiV-FliZ feedback loop does not cause class 3 bimodality. In this study, we investigated the  
87 mechanism governing the bimodal expression of class 3 genes. In support of previous work, we  
88 found that the mechanism is different than the one governing bimodal expression of class 2 genes.  
89 Further, we found that it results from the  $\sigma^{28}$ -FlgM developmental checkpoint. In the process, our  
90 data explain a number of previous results and further our understanding of how flagellar gene  
91 expression is regulated in *S. enterica*.

92

## 93 RESULTS

94 **FliZ is not does not govern bimodal expression of class 3 genes.** We measured the  
95 response of class 2 and class 3 promoters to nutrients in single cells using flow cytometry. The  
96 goal of these experiments was to determine whether the responses of these two promoter classes  
97 were coupled. In particular, would we observe cells where class 2 promoters were active and  
98 class 3 promoters inactive? Or, would we only observe cells where both promoter classes were  
99 either active or inactive? We eliminated the possibility of observing cells where the class 2  
100 promoters were inactive and the class 3 promoters active from the outset given the known  
101 hierarchy among the promoter classes. We further note that previous experiments only measured  
102 the response of a single promoter and thus could not be used to examine coupling.

103 To measure expression from both promoter classes, we created transcriptional fusions of the  
104 class 2 *flhB* promoter to the red fluorescent protein mCherry (28) and the class 3 *fliC* promoter to  
105 the yellow fluorescent protein Venus (29). These transcriptional reporters were then integrated  
106 single copy into the *araB* gene and  $\lambda$  attachment site, respectively. This design enabled us to  
107 measure expression from both promoters in single cells using flow cytometry. The cells were  
108 grown to late exponential phase in Vogel-Bonner medium E supplemented (30) with 0.2% glucose  
109 and various concentrations of yeast extract, where the latter served as the inducing nutrient, prior  
110 to analysis by flow cytometry.

111 The response to yeast extract is shown in **Figure 1A**. Consistent with previous studies, we  
112 observed two co-existing populations at intermediate (0.2-1%) yeast extract concentrations, one  
113 where both promoters were inactive and the other where both promoters were active. We further  
114 found that the activities of both promoters were coupled: in cells where the class 2 *flhB* promoter  
115 was active, the class 3 *fliC* promoter was also active. We did not observe any population where  
116 the class 2 *flhB* promoter was active and the class 3 *fliC* promoter was inactive, which would  
117 correspond to the upper left quadrant in the panels of **Figure 1A**. Collectively, these results  
118 demonstrate that the responses of these two promoters are tightly coupled. These results are not

119 particularly surprising given the transcriptional hierarchy within the flagellar gene network. One  
120 aspect not considered in the present study was the temporal response, where we would expect  
121 activation of the class 2 promoters to precede activation of the class 3 promoters during early  
122 exponential phase, with an intervening lag in between (17).

123 We next investigated the response of a  $\Delta fliZ$  mutant. Previous studies have shown that the  
124 bimodal response of class 2 promoters but not class 3 promoters was eliminated in this mutant  
125 (5, 8). These results are confirmed in **Figure 1B**, where we observed a homogeneous response  
126 to nutrients for the class 2 *flhB* promoter and a bimodal response for the class 3 *fliC* promoter.  
127 These results clearly demonstrate that separate mechanisms govern the bimodal response of  
128 class 2 and class 3 promoters, because we can eliminate it for one promoter class but not for the  
129 other.

130  
131 **Class 3 gene expression is monostable in  $\Delta ydiV$  mutant.** FliZ participates with YdiV in a  
132 double-negative feedback loop. Furthermore, YdiV governs the nutritional response: nutrients  
133 inhibit the expression of YdiV, which in turn inhibits the expression of class 2 genes through  
134 FlhD<sub>4</sub>C<sub>2</sub>. Previous studies have shown that class 2 promoters are active (ON state) in a  $\Delta ydiV$   
135 mutant irrespective of whether yeast extract is added. As shown in **Figure 2**, the same behavior  
136 was also observed for the class 3 *fliC* promoter, where this promoter was found to be active (ON  
137 state) in all cells. These results are again expected, because the activities of these two promoter  
138 classes are coupled (**Figure 1**). We do note that there was a small population of  $\Delta ydiV$  mutants  
139 where the promoters exhibited intermediate levels of expression, distinct from those in the ON  
140 state. The origin of this behavior is not known, though others have also observed this intermediate  
141 activity state (3, 8).

142  
143 **FlgM is necessary for class 3 bimodality.**  $\sigma^{28}$  and FlgM are the principal regulators of class  
144 3 gene expression. We first tested how FlgM affects the expression of class 3 genes by exploring

145 the behavior of a  $\Delta flgM$  mutant. As shown in **Figure 3A**, the class 3 *fliC* promoter still exhibited a  
146 bimodal response to nutrients in a  $\Delta flgM$  mutant. These results do not establish whether FlgM is  
147 necessary for class 3 bimodality. The reason is that class 2 gene expression is bimodal in a  $\Delta flgM$   
148 mutant (3). As a consequence, class 3 gene expression will also be bimodal in a  $\Delta flgM$  mutant,  
149 irrespective of whether there is a separate mechanism for bistability due to the transcriptional  
150 hierarchy among the promoter classes.

151 To determine whether FlgM is necessary for class 3 bimodality, we tested the response of a  
152  $\Delta fliZ \Delta flgM$  mutant, because class 2 gene expression is unimodal in this mutant (3). As shown in  
153 **Figure 3B**, the class 3 *fliC* promoters in a  $\Delta fliZ \Delta flgM$  mutant exhibited a homogenous response  
154 to nutrients. We also investigated the response of a  $\Delta ydiV \Delta flgM$  mutant as a control (**Figure 3C**).  
155 The response in this case was similar to a  $\Delta ydiV$  mutant (**Figure 2**), where all cells were in the  
156 ON state. The only difference is that we observed far less cells in the intermediate expression  
157 state. As noted above, we cannot explain this intermediate state. That said, the number of cells  
158 in this state was reduced when gene expression was further enhanced due to loss of *flgM*.

159  
160 **Modeling predicts that the  $\sigma^{28}$ -FlgM developmental checkpoint is sufficient to induce**  
161 **class 3 bimodality.** The results in **Figure 3** demonstrate that FlgM is necessary for class 3  
162 bimodality in a  $\Delta fliZ$  mutant. These results also suggest that the mechanism most likely involves  
163  $\sigma^{28}$ , because FlgM regulates flagellar gene expression by sequestering  $\sigma^{28}$ . One hypothesis is  
164 that class 3 bimodality results from the  $\sigma^{28}$ -FlgM developmental checkpoint. To explore this  
165 hypothesis, we constructed a simple mathematical model of this checkpoint that relates the  
166 concentration of free  $\sigma^{28}$  to the FlgM secretion rate (**Figure 4A**). This model is a simplified version  
167 of a previously published model of flagellar gene regulation (19), in the sense that it focuses only  
168 on the  $\sigma^{28}$ -FlgM checkpoint (details provided in the methods section).

169 A representative response is shown in **Figure 4B**. A critical feature of this response is  
170 presence of a threshold. Below this threshold secretion rate, there is no free  $\sigma^{28}$  in the cell – all is

171 bound to FlgM. Only when the FlgM secretion rate exceeds this threshold does the response  
172 become hyperbolic. Two mechanisms are responsible for this threshold, which underlies the  
173 developmental checkpoint. The first is that  $\sigma^{28}$  induces the expression of *flgM*, which is under the  
174 control of both a class 2 and class 3 promoter. This negative feedback loop ensures that sufficient  
175 FlgM is produced to effectively sequester any free  $\sigma^{28}$  in the absence of secretion. The second is  
176 that the binding of  $\sigma^{28}$  and FlgM is effectively irreversible, with a half-life of approximately one  
177 hour (31). This means that if the concentration of FlgM exceeds  $\sigma^{28}$ , then all of the  $\sigma^{28}$  will be  
178 bound to FlgM. Together these two mechanisms ensure that there is no free  $\sigma^{28}$  in the cell in the  
179 absence of secretion. Indeed, this what we observe experimentally (**Figure S2**). However, if the  
180 secretion rate is sufficiently high, such that the cell is pumping FlgM out of the cell at a rate faster  
181 than it is being produced, then  $\sigma^{28}$  is free to activate the class 3 promoters.

182 The secretion rate is expected to be proportional to the number of functional HBBs in the cell.  
183 As the flow-cytometry data show (**Figure 1A**), there is significant variability in gene expression  
184 among different cells even in the absence of bimodality. This means that at intermediate  
185 expression states (corresponding to intermediate yeast extract concentrations), some cells may  
186 not build enough HBBs to exceed the secretion threshold for inducing class 3 gene expression  
187 whereas others will. If the response is sufficiently sharp, then this will suffice in generating class  
188 3 bimodality even when distribution of HBBs is homogeneous. To test this hypothesis, we  
189 simulated the model assuming that secretion rate was variable within individual cells. We then  
190 varied the mean secretion rate, assuming it was homogeneously distributed in the population with  
191 fixed variance, to mimic the effect of HBB variability. All other model parameters were fixed. As  
192 shown in **Figure 4C**, variability in the secretion rate is sufficient to generate bimodality. Such a  
193 mechanism could explain class 3 bimodality in a  $\Delta fliZ$  mutant.

194 To test this prediction, we first replaced the native *fliA* promoter with an anhydrotetracycline-  
195 inducible one ( $P_{fliA}::tetRA$ ). The goal here was to decouple *fliA* expression from the other flagellar  
196 genes. When we tested this promoter in a  $\Delta fliZ\Delta flgM$  mutant, we observed a homogenous



197 response to anhydrotetracycline (aTc) as expected (**Figure 5A**). In particular, higher  $\sigma^{28}$   
198 expression is expected to result in higher class 3 gene expression. We next explored this promoter  
199 in a  $\Delta fliZ$  mutant (**Figure 5B**). In these experiments, we used yeast extract to tune the expression  
200 of the class 2 genes and, indirectly, the rate of FlgM secretion. At low yeast extract concentrations,  
201 the class 3 *fliC* promoter was effectively off. This would correspond to the scenario where the  
202 secretion rate is below the threshold. However, when the concentrations of yeast extract were  
203 increased, we observe the emergence of a second population, corresponding the class 3 ON  
204 state. This corresponds to the scenario where some cells exceed the threshold (ON state) and  
205 others do not (OFF state).

206 One limitation of these experiments is that yeast extract represses the tetracycline promoter  
207 at high concentrations (>1% yeast extracted) (3), thereby limiting the range of concentrations that  
208 can be tested. Therefore, we next replaced native *flgM* promoter with an aTc-inducible one  
209 ( $P_{flgM}::tetRA$ ). In the absence of aTc, we observed two populations, likely due to leaky expression  
210 from the *tetRA* promoter (**Figure 6**). However, when the concentration of aTc was increased, the  
211 fraction of cells in the ON state decreased. This was most pronounced at low yeast extract  
212 concentrations, where the rate of FlgM secretion is low. At higher yeast extract concentrations,  
213 corresponding to higher secretion rates, higher concentrations of aTc were required to reduce the  
214 fraction of cells in the ON state.

215 As a further test of our model, we measured class 3 gene expression in a  $\Delta HBB$  ( $\Delta flgG-J$ )  
216 mutant at varying concentrations of yeast exact. This mutant does not build function HBBs and  
217 thus is incapable of FlgM secretion. We would expect no class 3 flagellar expression. Consistent  
218 with our hypothesis, cells were not able to activate the class 3 gene expression as  $\sigma^{28}$  exists  
219 completely in the  $\sigma^{28}$ -FlgM complex (**Figure S2**). In the absence of secretion, any  $\sigma^{28}$  produced  
220 would be immediately sequestered by FlgM, a key assumption in our model explain the class 3  
221 bimodalilty.

222           Collectively, these experiments support a number of key model predictions, namely that the  
223 class 3 bimodalilty arises from the sharp threshold imposed by the  $\sigma^{28}$ -FlgM checkpoint. In other  
224 words, our data suggest that the cells need to build a minimum number of HBB's in order to trigger  
225 this checkpoint and activate class 3 gene expression. At intermediate levels of flagellar gene  
226 expression, some cells will not have built a sufficient of HBB's to trigger the checkpoint whereas  
227 other will have. Such a mechanism is consistent with our data and would explain class 3  
228 bimodalilty.  
229

## 230 **DISCUSSION**

231 Flagellar gene expression is bimodal in *S. enterica* (3-9). Under certain growth conditions,  
232 some cells express the flagellar genes whereas others do not. This results in mixed populations  
233 of motile and non-motile cells. Nutrients were previously found to specify the fraction of motile  
234 cells within the population (3). Whether nutrients alone specify the motile fraction is not presently  
235 known. In the present study, we found that two independent mechanisms induce the bimodal  
236 expression of the flagellar genes. One induces the bimodal expression of the class 2 genes in  
237 response to nutrient concentrations. This was previously found to result from a double-negative  
238 feedback loop involving FliZ and YdiV (3). The other induces the bimodal expression of the class  
239 3 genes. The key finding in the present work is that class 3 bimodality results from the  $\sigma^{28}$ -FlgM  
240 checkpoint.

241 Stewart and coworkers proposed that motility is bimodal in *S. enterica* because it generates  
242 mixed populations of invasive and non-invasive cells due to the coupling of motility and virulence  
243 i (6, 32, 33). This model, however, does not explain why *S. enterica* employs two mechanisms to  
244 induce bimodal expression of the flagellar genes when one alone would suffice. Among the two  
245 mechanisms, the FliZ-YdiV feedback loop is clearly dominant, because it specifies the likelihood  
246 that an individual cell will be motile or not in response to external nutrient concentrations (and  
247 possibly other factors as well). Class 3 bimodality, on the other hand, appears to ensure that cells  
248 express class 3 genes only when they have built a sufficient number of HBBs. Such a mechanism  
249 would efficiently manage resources within the cell, ensuring that cells express class 3 genes only  
250 when needed. The effect is masked in the wild type under the conditions explored in this study,  
251 because the FliZ-YdiV feedback loop ensures that motile cells builds a sufficient number of HBBs  
252 to exceed the threshold. It may, however, play a dynamic role and shut off class 3 gene expression  
253 when, for example, a daughter cell inherits too few flagella and only turns it on when sufficient  
254 numbers are built. Alternatively, class 3 bimodality may simply be a consequence of the sharp

255 threshold imposed by the  $\sigma^{28}$ -FlgM checkpoint, one that only manifests itself in mutants with  
256 reduced expression of the flagellar genes.

257 We note that this model extends a previous one proposed for the  $\sigma^{28}$ -FlgM checkpoint (19),  
258 where it was proposed that it continuously regulates class 3 gene expression in response to HBB  
259 abundance using FlgM secretion as proxy signal. That model also predicted that the threshold is  
260 not sharp. However, it was based on population-level measurement of gene expression, which  
261 lack the resolution necessary to capture phenomena such as bimodality. The present study  
262 suggests that the threshold is indeed sharp, as this alone explain class 3 bimodality (**Figure 4**).  
263 In addition, the original model also predicted that completion of more than one HBB may be  
264 necessary to induce class 3 gene expression. The present study supports this claim, because it  
265 would explain why some cells exceed the threshold and others do not. If only a single HBB was  
266 necessary, then it is unlikely that we clearly observe two populations because the threshold would  
267 be more easily exceed (**Figure 1**).

268 We also note that the present analysis was limited to steady-state exponential growth. Others  
269 have previously explored the temporal dynamics of flagellar gene expression at single-cell  
270 resolution (5, 8, 34) and identified a number of transient phenomena that cannot be explained by  
271 the working model developed in the present study. Many factors are known to affect the dynamic  
272 response of flagellar gene expression. While some have been explored in the past (17-19), these  
273 previous studies did not consider heterogeneity among individual cells.

274 In conclusion, we have demonstrated that the flagellar gene network encodes two  
275 mechanisms for bimodal gene expression, one controlling the class 2 genes and the other  
276 controlling the class 3 genes. In the process, we have furthered our understanding of how this  
277 complex gene network is regulated in *S. enterica*. Our results also emphasize the need to  
278 measure flagellar gene expression at single-cell resolution, because bulk assays miss much of  
279 the complexity of this regulation. As discussed above, many questions still remain. One concerns  
280 the mechanism for nutrient sensing. In particular, this sensing mechanism does not appear to

281 respond to single nutrient but rather the general nutrient/energetic state of the cell (3). It may also  
282 respond to other signals as well. Second, additional mechanisms are known to regulate the  
283 dynamics of flagellar gene expression. How these regulatory mechanisms manifest themselves  
284 at single-cell resolution is still not known. Finally, we still do not know the rates of switching  
285 between the non-motile and motile states or whether these transitions are reversible during  
286 different phases of growth. More work is needed to answer these questions.

287

## 288 MATERIALS AND METHODS

289 **Media and growth conditions.** All experiments were performed at 37°C in Vogel-Bonner  
290 minimal E (VBE) medium (200 mg/l MgSO<sub>4</sub>·7H<sub>2</sub>O, 2 g/l citric acid monohydrate, 10 g/l anhydrous  
291 K<sub>2</sub>HPO<sub>4</sub> and 3.5 g/l NaNH<sub>4</sub>PO<sub>4</sub>) (30) supplemented with 0.2% glucose and yeast extract at the  
292 specified concentrations. Luria-Bertani medium (10 g/l tryptone, 5 g/l yeast extract, 10 g/l NaCl)  
293 was used for strain construction. Strains containing the plasmids pKD46, pCP20, and pINT-ts  
294 were grown at 30°C. Antibiotics were used at following concentrations: ampicillin at 100 µg/ml,  
295 chloramphenicol at 20 µg/ml and kanamycin at 40 µg/ml.

296  
297 **Bacterial strains and plasmid construction.** All strains (**Table 1**) are derivatives of *S.*  
298 *enterica* serovar Typhimurium 14028 (American Type Culture Collection). The  $\Delta flhDC$  (region  
299 2032540 to 2033471),  $\Delta flgM$  (region 1215209 to 1215502),  $\Delta flhZ$  (region 2055542 to 2056093),  
300  $\Delta ydiV$  (region 1432774 to 1433487), and  $\Delta HBB$  ( $\Delta flgG-J$ , region 1261788 to 1265393) mutants  
301 were constructed using the method of Datsenko and Wanner (Datsenko & Wanner, 2000). The  
302 integrated cassettes were then moved to a clean wild-type background by P22 transduction prior  
303 to removal of the antibiotic marker with pCP20. Using the same method, the promoters P<sub>flhA</sub> (region  
304 2057139 to 2056887) and P<sub>flgM</sub> (region 1215584 to 1215502) were replaced by a *tetRA* cassette  
305 to construct the  $\Delta P_{flhA}::tetRA$  and  $\Delta P_{flgM}::tetRA$  mutants, respectively. The class 2 P<sub>flhB</sub> promoter  
306 (region from 2023494 to 2022815) and class 3 P<sub>flhC</sub> promoter (region from 2061043 to 2060527)  
307 were used as representative class 2 and class 3 flagellar promoters, respectively. Single-copy  
308 transcriptional fusion of P<sub>flhC</sub> promoter to the fluorescent protein Venus was made by cloning into  
309 the plasmid pVenus using KpnI and EcoRI restriction sites and integrating the plasmids into the  
310 chromosome using the CRIM method. The P<sub>flhB</sub> promoter (region from 2023494 to 2022815) was  
311 cloned into the plasmid pKW667 (35), containing the *mCherry* gene, using the XhoI and EcoRI  
312 restriction sites, yielding the plasmid pPROTet-*flhB'*-mCherry. The chloramphenicol resistance  
313 gene, P<sub>flhB</sub> promoter, *mCherry* and terminator were then PCR amplified from the plasmid using

314 the primers containing 40 base-pair homology to the flanking regions of the *araB* gene. The PCR  
315 product was used to replace *araB* gene with  $P_{flhB}$ -*mCherry* reporter construct into the chromosome  
316 using  $\lambda$ -Red recombination (36). The integrated plasmids were then moved into the wild type and  
317 the different mutants by P22 transduction.

318

319 **Flow cytometry.** Cells were grown overnight at 37°C in VBE medium supplemented with  
320 0.2% glucose and 0.2% yeast extract as described previously (3, 37). Briefly, the cells were then  
321 subcultured to an optical density ( $OD_{600}$ ) of 0.05 in fresh VBE media supplemented with 0.2%  
322 glucose and the specified concentration of yeast extract and anhydrotetracycline (aTc). Following  
323 subculture, the cells were then allowed to grow at 37°C for 5 hours before harvesting. The cells  
324 were then pelleted by centrifuging at 3200  $\times g$  for 10 minutes and resuspended in phosphate-  
325 buffered saline (PBS) solution with 14.3  $\mu$ M DAPI (4'-6-diamidino-2-phenylindole) and 50  $\mu$ g/ml  
326 chloramphenicol. The suspension was then incubated at room temperature for half an hour. The  
327 cells were then analyzed using BD LSR Fortessa flow cytometer. Fluorescence values for  
328 approximately 100,000 cells were recorded using Pacific Blue channel (excitation: 405 nm;  
329 emission: 450/50 nm) for DAPI, fluorescein isothiocyanate channel (excitation: 488 nm; emission:  
330 530/30 nm) for Venus fluorescence and phycoerythrin-Texas Red channel (excitation 561 nm;  
331 emission 610/20 nm) for mCherry fluorescence. The cells were distinguished from other debris  
332 by gating the population stained with DAPI. Data extraction and analysis for the FACS  
333 experiments were done using FCS Express Version 5 (De Novo Software). The data was  
334 exported to Microsoft Excel and further processed in Origin Pro 2018b to obtain histograms (for  
335 a single promoter) and density plots (for two promoters). The histograms show the distribution of  
336 promoter activities in individual cells as determined based on Venus fluorescence. The density  
337 plots show the distribution of promoter activities in individual cells as determined based on Venus  
338 and mCherry fluorescence. Data were smoothed and normalized to a peak value of 100 using the

339 built-in function in FCS Express Version 5 to facilitate interpretation. All experiments were  
340 performed at least three times. Representative histograms and heatmaps are shown.

341  
342 **Model of  $\sigma^{28}$ /FlgM checkpoint.** The model is a simplified version of a previously published  
343 model of the  $\sigma^{28}$ /FlgM regulatory circuit (19). In particular, it does not include any other regulatory  
344 components besides  $\sigma^{28}$  and FlgM. Our rationale here is to demonstrate that these two proteins  
345 are sufficient to generate class 3 bistability. In addition, our analysis only focuses on the steady-  
346 state behavior of the flagellar network. While the model is formulated as a set of coupled  
347 differential equations, our subsequent analysis considered only the steady-state behavior as the  
348 corresponding experiments only measure gene expression at a single time point during  
349 exponential growth. In addition, we assumed that the association between  $\sigma^{28}$  and FlgM is fast  
350 and effectively irreversible. Finally, we assumed that the degradation and dilution rates for species  
351 were the same: relaxing this assumption had no significant effect. Since we ignored temporal  
352 dynamics in our simulations, the associated kinetic parameters were taken to be one.

353 The governing equations for the model are:

354 
$$\frac{dA}{dt} = b_A - g_A A - kAM + k_s \frac{X}{K_s + X} \quad (1)$$

355 
$$\frac{dM}{dt} = b_M + b_M^A A - g_M M - kAM \quad (2)$$

356 
$$\frac{dX}{dt} = -g_X X - kAM - k_s \frac{X}{K_s + X} \quad (3)$$

357 where  $A$  is the concentration of free  $\sigma^{28}$ ,  $M$  the concentration of free FlgM, and  $X$  is the  
358 concentration of  $\sigma^{28}$ -FlgM complex.

359 The simulation results shown in **Figure 4B** plot the steady-state concentration of free  $\sigma^{28}$  ( $A$ )  
360 as a function of the secretion rate  $k_s$  for different values of basal FlgM expression  $b_M$ . In



361 simulation results shown in **Figure 4C**, we assumed that the secretion rate  $k_s$  was normally  
362 distributed in the population with varying means ( $\langle k_s \rangle = 3, 3.5, 4, 4.5, 5$ ) and fixed variance  
363 ( $\text{var}(k_s) = 0.25$ ). This was used to model the expected variability in the steady-state number of  
364 HBB's within individual cells. In addition, we also added noise to calculated free  $\sigma^{28}$  concentrations  
365 to more accurately capture our single-cell gene expression experiments (a log-normally  
366 distributed random variable with zero mean and variance of 0.04 were added to the model results).  
367 The histograms result from Monte-Carlo simulations involving 5 million cells. In other words, we  
368 randomly sampled  $k_s$  from a lognormal distribution 5 million times with different mean values and  
369 then calculated the associated free  $\sigma^{28}$  concentrations, with some additional noise added for  
370 aesthetic purposes (otherwise, the histogram is spiky at low  $\sigma^{28}$  concentrations). All simulations  
371 were performed in MATLAB (Mathworks, Natick, MA).

372

373 **REFERENCES**

- 374 1. Berg HC. 2003. The rotary motor of bacterial flagella. Annual review of biochemistry 72:19-  
375 54.
- 376 2. Wada T, Morizane T, Abo T, Tominaga A, Inoue-Tanaka K, Kutsukake K. 2011. EAL  
377 domain protein YdiV acts as an anti-FlhD4C2 factor responsible for nutritional control of  
378 the flagellar regulon in Salmonella enterica Serovar Typhimurium. Journal of bacteriology  
379 193:1600-11.
- 380 3. Koirala S, Mears P, Sim M, Golding I, Chemla YR, Aldridge PD, Rao CV. 2014. A nutrient-  
381 tunable bistable switch controls motility in Salmonella enterica serovar Typhimurium. mBio  
382 5:e01611-14.
- 383 4. Cummings LA, Wilkerson WD, Bergsbaken T, Cookson BT. 2006. In vivo, fliC expression  
384 by Salmonella enterica serovar Typhimurium is heterogeneous, regulated by ClpX, and  
385 anatomically restricted. Molecular microbiology 61:795-809.
- 386 5. Saini S, Koirala S, Floess E, Mears PJ, Chemla YR, Golding I, Aldridge C, Aldridge PD,  
387 Rao CV. 2010. FliZ induces a kinetic switch in flagellar gene expression. Journal of  
388 bacteriology 192:6477-81.
- 389 6. Stewart MK, Cummings LA, Johnson ML, Berezow AB, Cookson BT. 2011. Regulation of  
390 phenotypic heterogeneity permits Salmonella evasion of the host caspase-1 inflammatory  
391 response. Proceedings of the National Academy of Sciences of the United States of  
392 America 108:20742-7.
- 393 7. Freed NE, Silander OK, Stecher B, Bohm A, Hardt WD, Ackermann M. 2008. A simple  
394 screen to identify promoters conferring high levels of phenotypic noise. PLoS genetics  
395 4:e1000307.
- 396 8. Stewart MK, Cookson BT. 2014. Mutually repressing repressor functions and multi-layered  
397 cellular heterogeneity regulate the bistable Salmonella fliC census. Molecular  
398 microbiology 94:1272-84.

- 399 9. Hamed S, Wang X, Shawky RM, Emara M, Aldridge PD, Rao CV. 2019. Synergistic action  
400 of SPI-1 gene expression in *Salmonella enterica* serovar typhimurium through  
401 transcriptional crosstalk with the flagellar system. *BMC Microbiol* 19:211.
- 402 10. Kutsukake K, Ohya Y, Iino T. 1990. Transcriptional analysis of the flagellar regulon of  
403 *Salmonella typhimurium*. *Journal of bacteriology* 172:741-7.
- 404 11. Chilcott GS, Hughes KT. 2000. Coupling of flagellar gene expression to flagellar assembly  
405 in *Salmonella enterica* serovar typhimurium and *Escherichia coli*. *Microbiology and*  
406 *molecular biology reviews* : MMBR 64:694-708.
- 407 12. Wang S, Fleming RT, Westbrook EM, Matsumura P, McKay DB. 2006. Structure of the  
408 *Escherichia coli* FlhDC complex, a prokaryotic heteromeric regulator of transcription.  
409 *Journal of molecular biology* 355:798-808.
- 410 13. Ikebe T, Iyoda S, Kutsukake K. 1999. Promoter analysis of the class 2 flagellar operons  
411 of *Salmonella*. *Genes & genetic systems* 74:179-83.
- 412 14. Ohnishi K, Kutsukake K, Suzuki H, Iino T. 1990. Gene *fliA* encodes an alternative sigma  
413 factor specific for flagellar operons in *Salmonella typhimurium*. *Molecular & general*  
414 *genetics* : MGG 221:139-47.
- 415 15. Ohnishi K, Kutsukake K, Suzuki H, Iino T. 1992. A novel transcriptional regulation  
416 mechanism in the flagellar regulon of *Salmonella typhimurium*: an antisigma factor inhibits  
417 the activity of the flagellum-specific sigma factor, sigma F. *Molecular microbiology* 6:3149-  
418 57.
- 419 16. Hughes KT, Gillen KL, Semon MJ, Karlinsey JE. 1993. Sensing structural intermediates  
420 in bacterial flagellar assembly by export of a negative regulator. *Science* 262:1277-80.
- 421 17. Brown JD, Saini S, Aldridge C, Herbert J, Rao CV, Aldridge PD. 2008. The rate of protein  
422 secretion dictates the temporal dynamics of flagellar gene expression. *Molecular*  
423 *microbiology* 70:924-37.

- 424 18. Aldridge C, Poonchareon K, Saini S, Ewen T, Soloyva A, Rao CV, Imada K, Minamino T,  
425 Aldridge PD. 2010. The interaction dynamics of a negative feedback loop regulates  
426 flagellar number in *Salmonella enterica* serovar Typhimurium. *Molecular microbiology*  
427 78:1416-30.
- 428 19. Saini S, Floess E, Aldridge C, Brown J, Aldridge PD, Rao CV. 2011. Continuous control  
429 of flagellar gene expression by the sigma28-FlgM regulatory circuit in *Salmonella enterica*.  
430 *Molecular microbiology* 79:264-78.
- 431 20. Kutsukake K, Iino T. 1994. Role of the FliA-FlgM regulatory system on the transcriptional  
432 control of the flagellar regulon and flagellar formation in *Salmonella typhimurium*. *Journal*  
433 *of bacteriology* 176:3598-605.
- 434 21. Yamamoto S, Kutsukake K. 2006. FliT acts as an anti-FlhD2C2 factor in the transcriptional  
435 control of the flagellar regulon in *Salmonella enterica* serovar typhimurium. *Journal of*  
436 *bacteriology* 188:6703-8.
- 437 22. Aldridge P, Karlinsey J, Hughes KT. 2003. The type III secretion chaperone FlgN regulates  
438 flagellar assembly via a negative feedback loop containing its chaperone substrates FlgK  
439 and FlgL. *Molecular microbiology* 49:1333-45.
- 440 23. Kutsukake K, Ikebe T, Yamamoto S. 1999. Two novel regulatory genes, fliT and fliZ, in  
441 the flagellar regulon of *Salmonella*. *Genes & genetic systems* 74:287-92.
- 442 24. Galeva A, Moroz N, Yoon YH, Hughes KT, Samatey FA, Kostyukova AS. 2014. Bacterial  
443 flagellin-specific chaperone FliS interacts with anti-sigma factor FlgM. *Journal of*  
444 *bacteriology* 196:1215-21.
- 445 25. Singer HM, Erhardt M, Hughes KT. 2013. RfIM functions as a transcriptional repressor in  
446 the autogenous control of the *Salmonella* Flagellar master operon flhDC. *Journal of*  
447 *bacteriology* 195:4274-82.

- 448 26. Takaya A, Erhardt M, Karata K, Winterberg K, Yamamoto T, Hughes KT. 2012. YdiV: a  
449 dual function protein that targets FlhDC for ClpXP-dependent degradation by promoting  
450 release of DNA-bound FlhDC complex. *Molecular microbiology* 83:1268-84.
- 451 27. Wada T, Tanabe Y, Kutsukake K. 2011. FliZ acts as a repressor of the ydiV gene, which  
452 encodes an anti-FlhD4C2 factor of the flagellar regulon in *Salmonella enterica* serovar  
453 typhimurium. *Journal of bacteriology* 193:5191-8.
- 454 28. Shaner NC, Campbell RE, Steinbach PA, Giepmans BN, Palmer AE, Tsien RY. 2004.  
455 Improved monomeric red, orange and yellow fluorescent proteins derived from *Discosoma*  
456 sp. red fluorescent protein. *Nature biotechnology* 22:1567-72.
- 457 29. Nagai T, Ibata K, Park ES, Kubota M, Mikoshiba K, Miyawaki A. 2002. A variant of yellow  
458 fluorescent protein with fast and efficient maturation for cell-biological applications. *Nature*  
459 *biotechnology* 20:87-90.
- 460 30. Vogel HJ, Bonner DM. 1956. Acetylornithinase of *Escherichia coli*: partial purification and  
461 some properties. *The Journal of biological chemistry* 218:97-106.
- 462 31. Chadsey MS, Karlinsey JE, Hughes KT. 1998. The flagellar anti-sigma factor FlgM actively  
463 dissociates *Salmonella typhimurium* sigma28 RNA polymerase holoenzyme. *Genes Dev*  
464 12:3123-36.
- 465 32. Stewart MK, Cookson BT. 2016. Evasion and interference: intracellular pathogens  
466 modulate caspase-dependent inflammatory responses. *Nature reviews Microbiology*  
467 14:346-59.
- 468 33. Stewart MK, Cookson BT. 2012. Non-genetic diversity shapes infectious capacity and host  
469 resistance. *Trends in microbiology* 20:461-6.
- 470 34. Sim M, Koirala S, Picton D, Strahl H, Hoskisson PA, Rao CV, Gillespie CS, Aldridge PD.  
471 2017. Growth rate control of flagellar assembly in *Escherichia coli* strain RP437. *Sci Rep*  
472 7:41189.

- 473 35. Wu K, Rao CV. 2010. The role of configuration and coupling in autoregulatory gene circuits.  
474 Mol Microbiol 75:513-27.
- 475 36. Datsenko KA, Wanner BL. 2000. One-step inactivation of chromosomal genes in  
476 Escherichia coli K-12 using PCR products. Proc Natl Acad Sci U S A 97:6640-5.
- 477 37. Koirala S, Rao CV. 2017. Dynamic Measures of Flagellar Gene Expression. Methods Mol  
478 Biol 1593:73-83.
- 479 38. Saini S, Brown JD, Aldridge PD, Rao CV. 2008. FliZ Is a posttranslational activator of  
480 FlhD4C2-dependent flagellar gene expression. Journal of bacteriology 190:4979-88.  
481

482 **Table 1:** Strains used in this study

| Strain | Relevant Characteristics                                                                                  | Source                           |
|--------|-----------------------------------------------------------------------------------------------------------|----------------------------------|
| 14028  | Wild type, serovar Typhimurium                                                                            | American Type Culture Collection |
| SK13   | $\Delta fliHDC$                                                                                           | This study                       |
| SK181  | $\Delta ydiV$                                                                                             | (3)                              |
| SK192  | $\Delta flgM$                                                                                             | (3)                              |
| SK220  | $\Delta HBB$                                                                                              | This study                       |
| SK258  | $\Delta fliZ$                                                                                             | (38)                             |
| SK405  | att $\lambda$ ::[kan P <sub>fliC</sub> -Venus oriR6K]                                                     | (3)                              |
| SK406  | $\Delta fliZ$ att $\lambda$ ::[kan P <sub>fliC</sub> -Venus oriR6K]                                       | This study                       |
| SK407  | $\Delta ydiV$ att $\lambda$ ::[kan P <sub>fliC</sub> -Venus oriR6K]                                       | This study                       |
| SK419  | $\Delta flgM$ att $\lambda$ ::[kan P <sub>fliC</sub> -Venus oriR6K]                                       | This study                       |
| XW541  | $\Delta HBB$ att $\lambda$ ::[kan P <sub>fliC</sub> -Venus oriR6K]                                        | This study                       |
| SK510  | att $\lambda$ ::[kan P <sub>fliC</sub> -Venus oriR6K] araB::[cm P <sub>fliH</sub> -mCherry]               | This study                       |
| XW300  | $\Delta fliZ$ att $\lambda$ ::[kan P <sub>fliC</sub> -Venus oriR6K] araB::[cm P <sub>fliH</sub> -mCherry] | This study                       |
| XW301  | $\Delta P_{fliA}$ ::tetRA att $\lambda$ ::[kan P <sub>fliC</sub> -Venus oriR6K]                           | This study                       |
| XW302  | $\Delta fliZ \Delta P_{fliA}$ ::tetRA att $\lambda$ ::[kan P <sub>fliC</sub> -Venus oriR6K]               | This study                       |
| XW303  | $\Delta fliHDC \Delta P_{fliA}$ ::tetRA att $\lambda$ ::[kan P <sub>fliC</sub> -Venus oriR6K]             | This study                       |

|       |                                                                                                                                  |            |
|-------|----------------------------------------------------------------------------------------------------------------------------------|------------|
| XW304 | $\Delta fliHDC \Delta fliZ \Delta P_{fliA}::tetRA$ att $\lambda$ ::[kan P <sub>fliC</sub> -Venus oriR6K]                         | This study |
| XW305 | $\Delta fliHDC \Delta flgM \Delta P_{fliA}::tetRA$ att $\lambda$ ::[kan P <sub>fliC</sub> -Venus oriR6K]                         | This study |
| XW306 | $\Delta fliHDC \Delta flgM \Delta fliZ \Delta P_{fliA}::tetRA$ att $\lambda$ ::[kan P <sub>fliC</sub> -Venus oriR6K]             | This study |
| XW307 | $\Delta flgM \Delta P_{fliA}::tetRA$ att $\lambda$ ::[kan P <sub>fliC</sub> -Venus oriR6K]                                       | This study |
| XW308 | $\Delta flgM \Delta fliZ \Delta P_{fliA}::tetRA$ att $\lambda$ ::[kan P <sub>fliC</sub> -Venus oriR6K]                           | This study |
| XW311 | $\Delta fliZ \Delta P_{flgM}::tetRA$ att $\lambda$ ::[kan P <sub>fliC</sub> -Venus oriR6K]                                       | This study |
| XW313 | $\Delta P_{fliA}::tetRA$ att $\lambda$ ::[kan P <sub>fliC</sub> -Venus oriR6K] araB::[cm P <sub>fliH</sub> -mCherry]             | This study |
| XW314 | $\Delta fliZ \Delta P_{fliA}::tetRA$ att $\lambda$ ::[kan P <sub>fliC</sub> -Venus oriR6K] araB::[cm P <sub>fliH</sub> -mCherry] | This study |

---

483

484



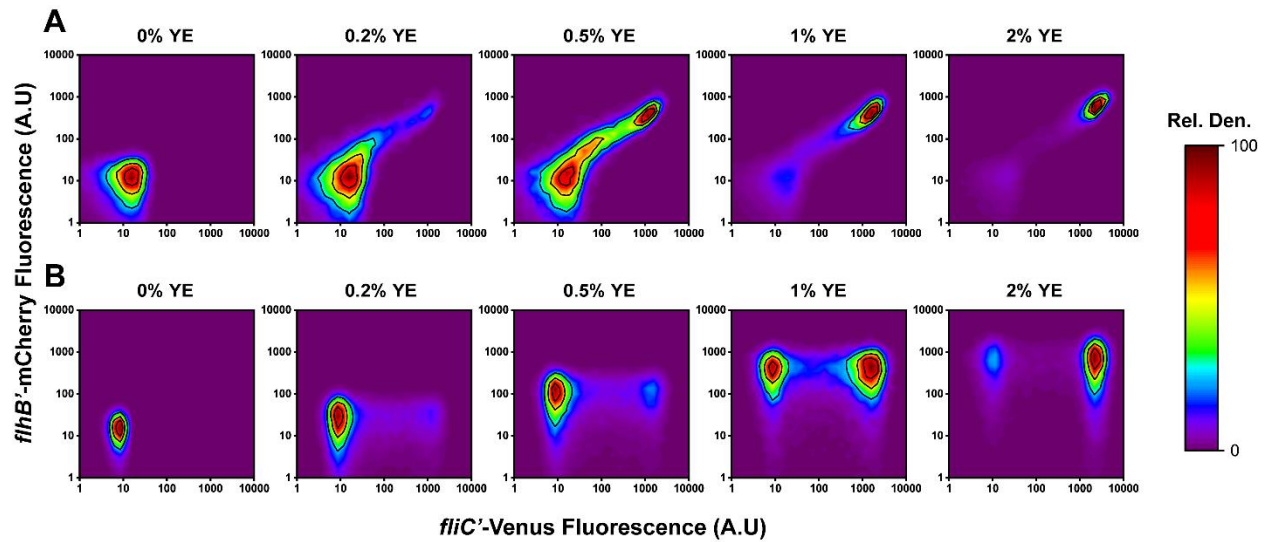

485

486 **Figure 1.** Response of class 2 *flhB* and class 3 *fliC* promoters for wild type (A) and *fliZ* mutant  
487 (B) to nutrients (yeast extract) using two-color flow cytometry as determined using single-copy  
488 transcriptional fusions of the class 2 *flhB* gene and the class 3 *fliC* gene to the fluorescent proteins  
489 mCherry and Venus, respectively. The heatmaps show the relative number (Rel. Den.) of cells  
490 exhibiting different levels of *flhB* and *fliC* promoter activity. **Figure S1** provides histograms for the  
491 same data.

492

493

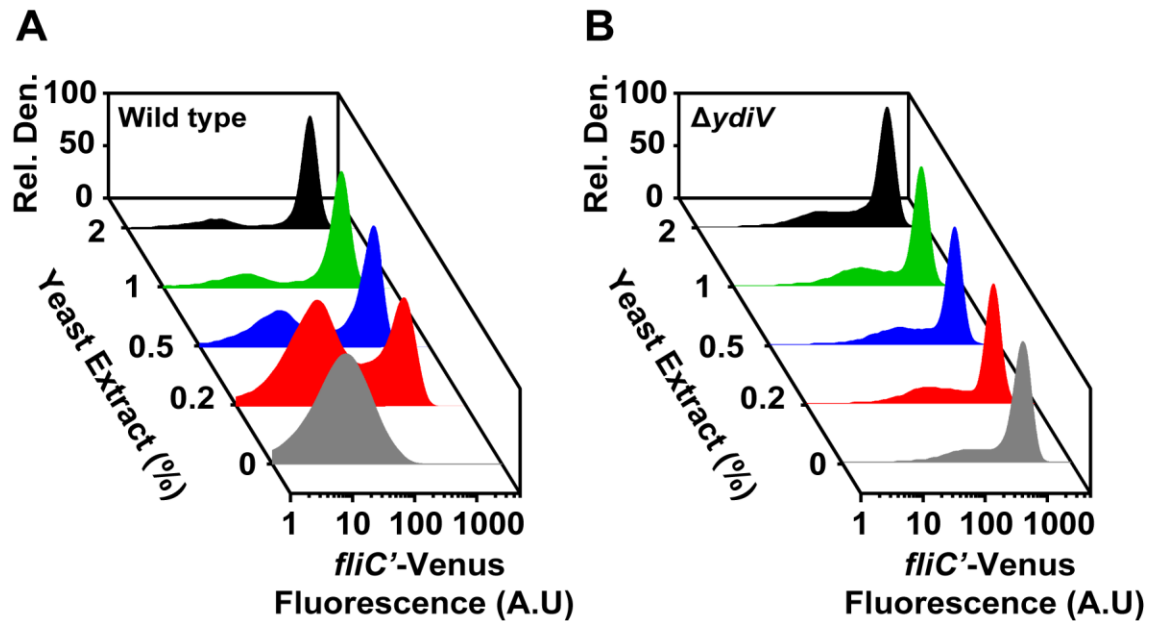

494

495 **Figure 2.** Response of class 3 *fliC* promoters to nutrients (yeast extract) in the wild type (A) and  
496 a  $\Delta ydiV$  mutant (B) using flow cytometry as determined using single-copy transcriptional fusion to  
497 the fluorescent protein Venus. The histograms show the relative number (Rel. Den.) of cells  
498 exhibiting different levels of *fliC* promoter activity.

499

500

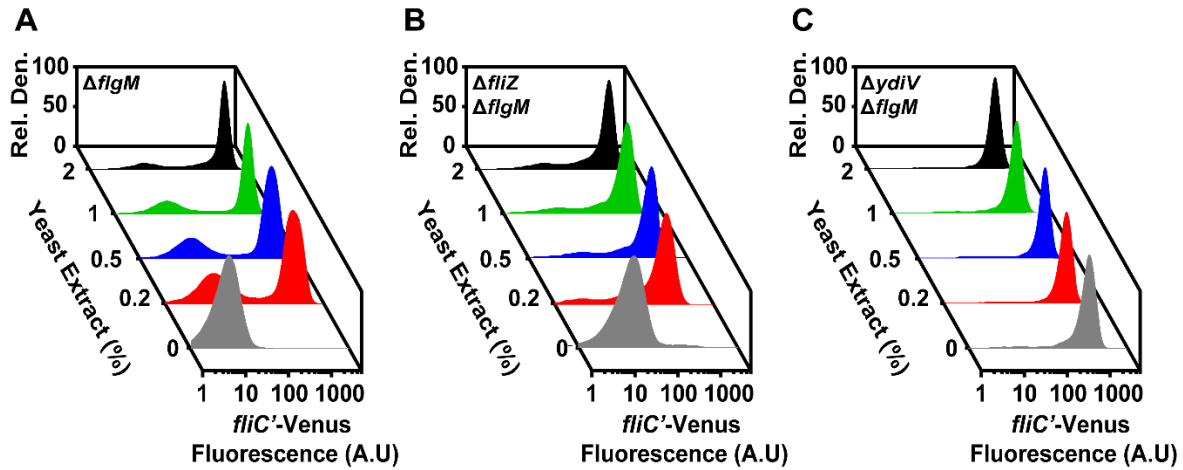

501

502 **Figure 3.** Response of class 3 *fliC* promoter to nutrients (yeast extract) in  $\Delta flgM$  mutant (A),  $\Delta fliZ$   
503  $\Delta flgM$  mutant (B) and  $\Delta ydiV \Delta flgM$  (C) mutant using flow cytometry as determined using single-  
504 copy transcriptional fusion to the fluorescent protein Venus. The histograms show the relative  
505 number (Rel. Den.) of cells exhibiting different levels of *fliC* promoter activity.

506

507

508

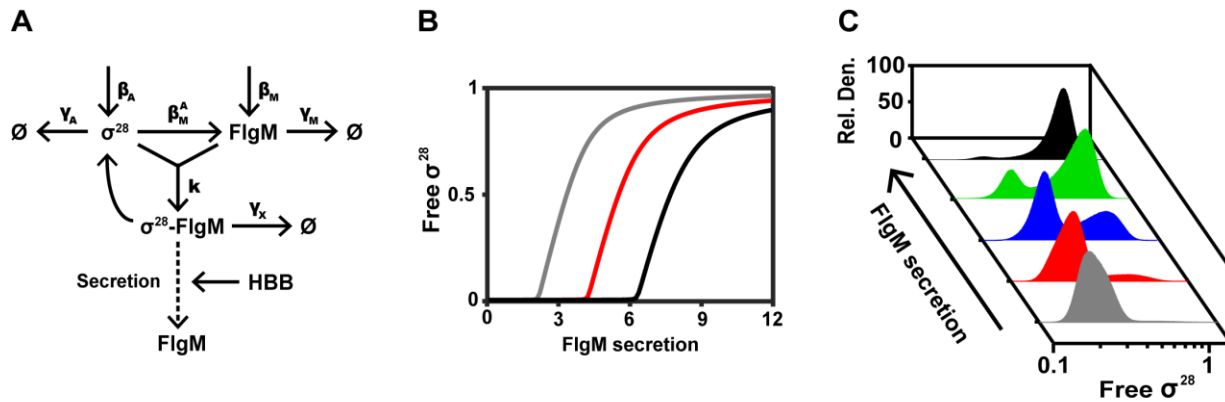

509

510 **Figure 4. A.** Key components in the flagellar network that govern class 3 bimodality as described

511 in the mathematical model. **B.** Model predicts that the concentration of free  $\sigma^{28}$  exhibits a sharp

512 threshold with respect to the FlgM secretion rate (parameter  $k_s$  in the model). Parameter values:

513  $b_A = 1$ ,  $g_A = 1$ ,  $k = 10^5$ ,  $K_s = 0.5$ ,  $b_A^M = 1$ ,  $g_M = 1$ , and  $g_X = 0.1$ . The different curves show how

514 the threshold is determined by the expression of FlgM from the class 2 *flgA* promoter (the

515 parameter  $b_M$  in the model: gray curve,  $b_M = 3$ ; red curve,  $b_M = 5$ ; black curve,  $b_M = 7$ ). **C.**

516 Model predicts bimodal distribution of free  $\sigma^{28}$  concentrations within the population. As the FlgM

517 secretion rate increases (parameter  $k_s$  in the model), the population shifts from an OFF state to

518 and ON state. The histograms show the relative number (Rel. Den.) of simulated cells with

519 different concentrations of free  $\sigma^{28}$ . The parameters are the same as before with  $b_M = 5$ . See

520 Materials and Methods for further details.

521

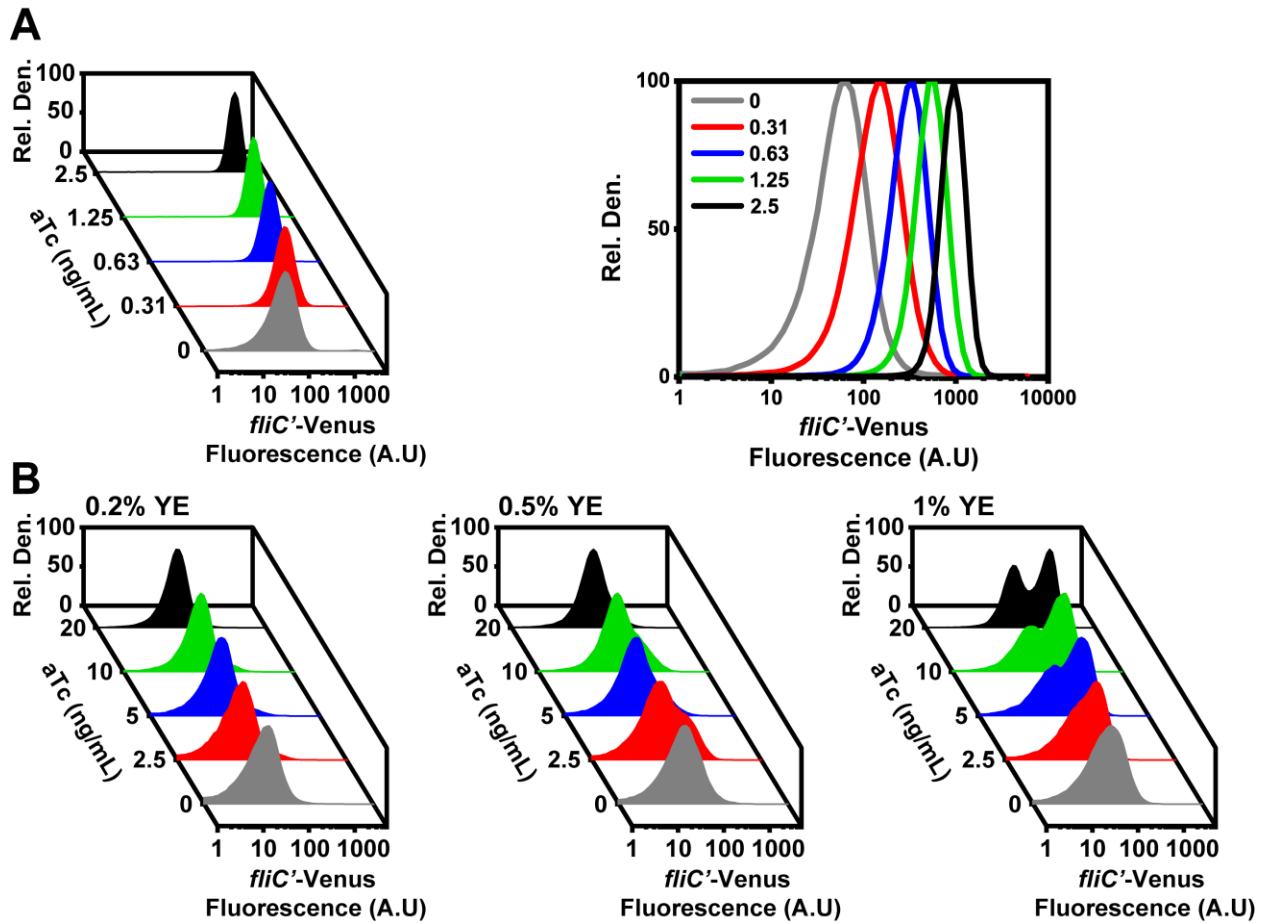

522

523 **Figure 5. A.** Response of class 3 *fliC* promoter is monostable with an aTc inducible  $\Delta fliA::tetRA$   
524 promoter in a  $\Delta fliZ \Delta fliG$  mutant. Right panel shows the same data plotted in two dimensions. **B.**  
525 Response of class 3 *fliC* promoter with an aTc inducible  $\Delta fliA::tetRA$  promoter in a  $\Delta fliZ$  mutant in  
526 various yeast extract concentrations. Response was determined using flow cytometry determined  
527 using single-copy transcriptional fusion to the fluorescent protein Venus. The histograms show  
528 the relative number (Rel. Den.) of cells exhibiting different levels of *fliC* promoter activity.

529

530

531

532

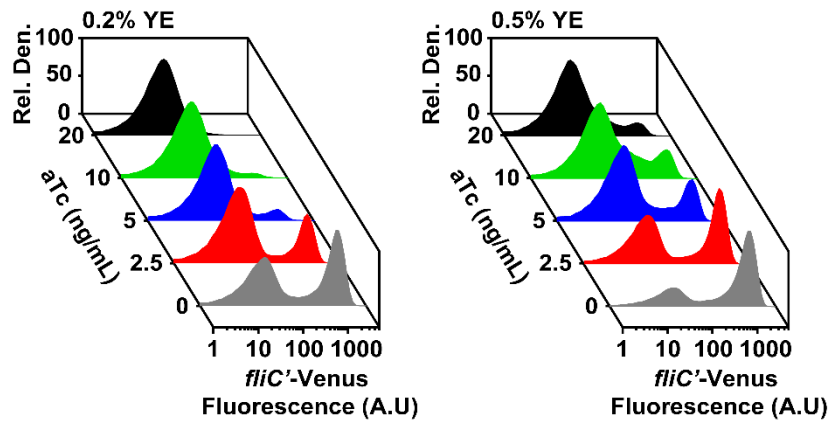

533

534 **Figure 6.** Response of class 3 *fliC* promoter with an aTc inducible  $\Delta flgM::tetRA$  promoter in a  
535  $\Delta fliZ$  mutant in 0.2% (left) and 0.5% (right) yeast extract using flow cytometry as determined using  
536 single-copy transcriptional fusion to the fluorescent protein Venus. The histograms show the  
537 relative number (Rel. Den.) of cells exhibiting different levels of *fliC* promoter activity.

538

539

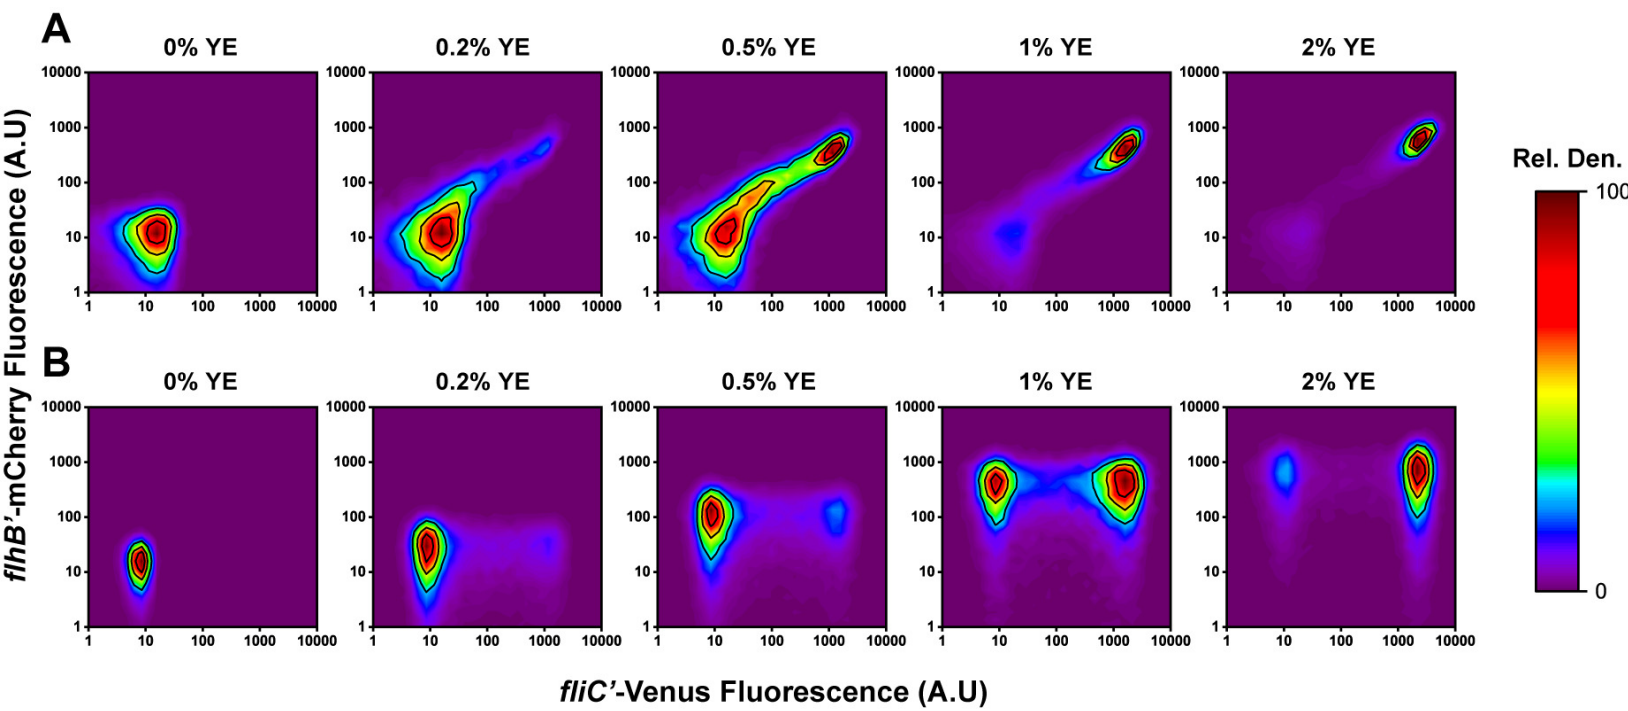

**A**

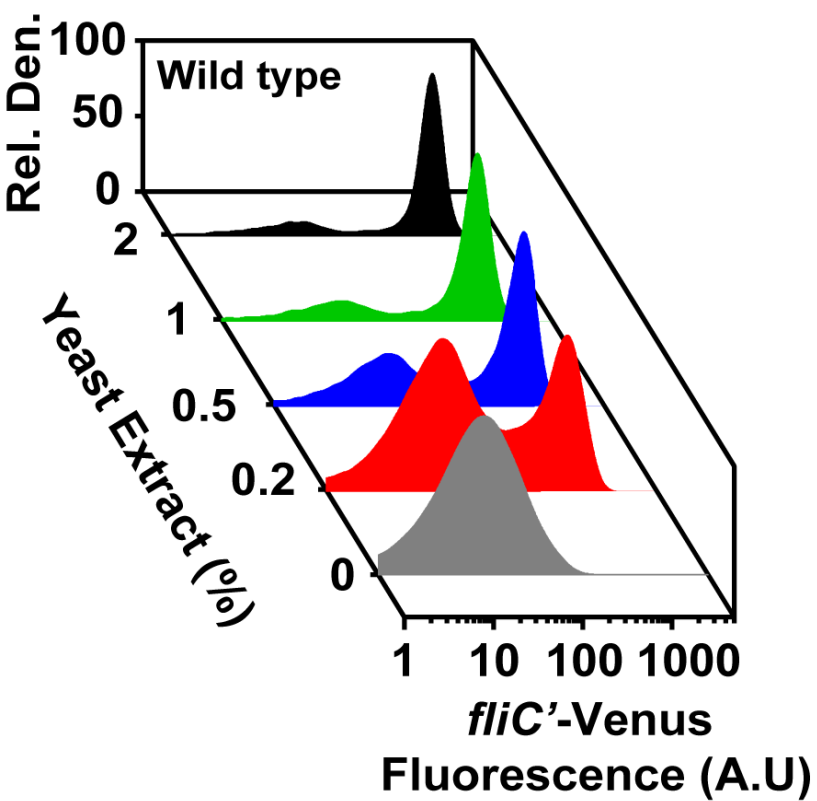

**B**

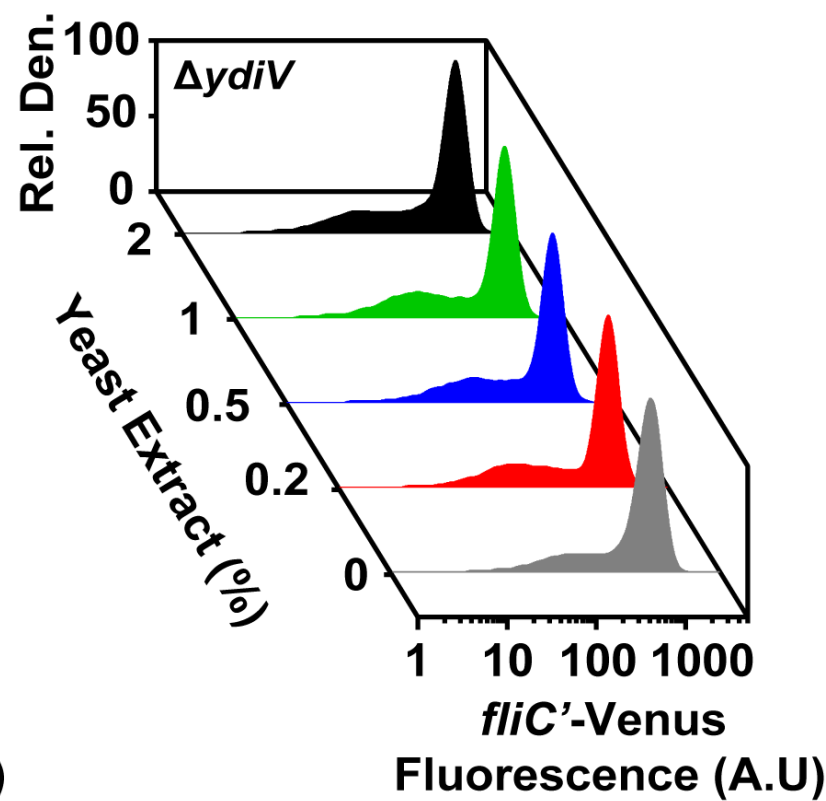



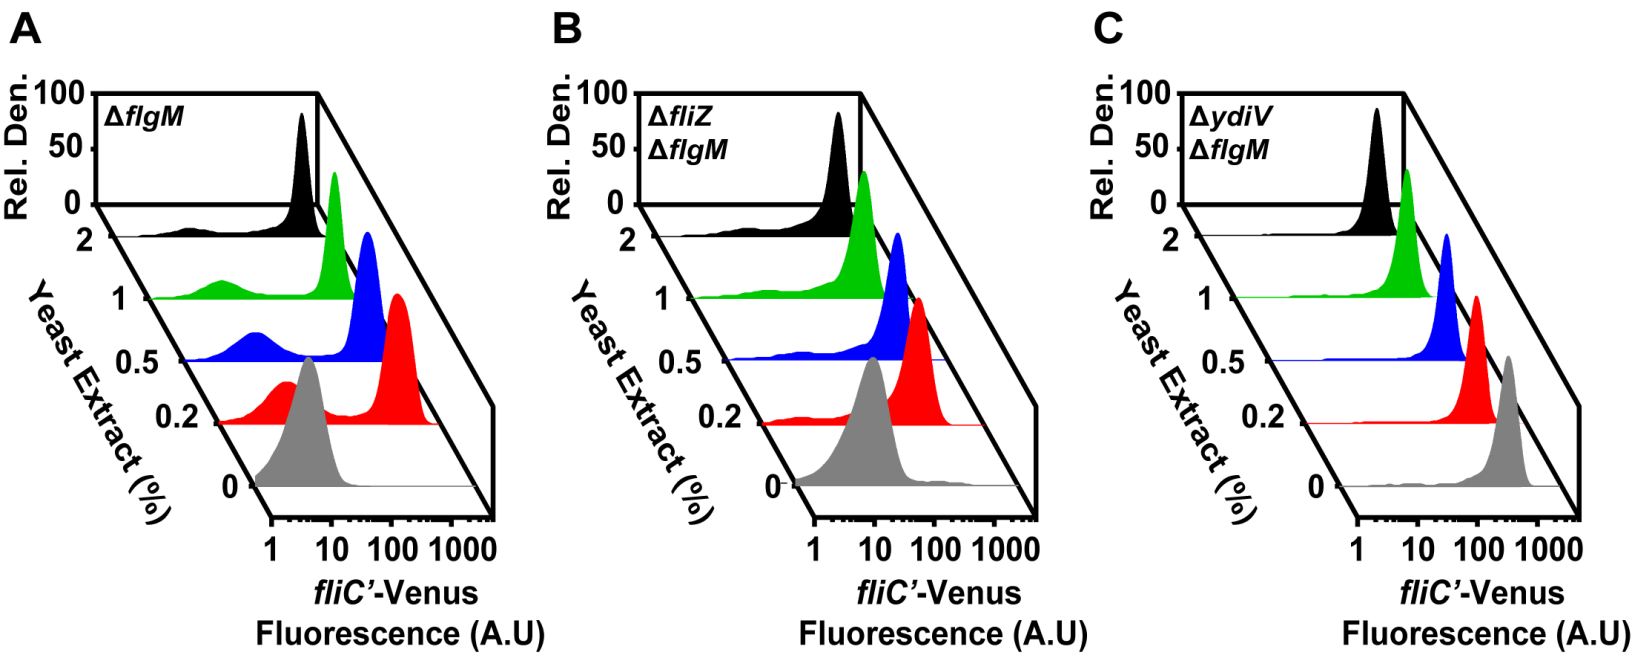

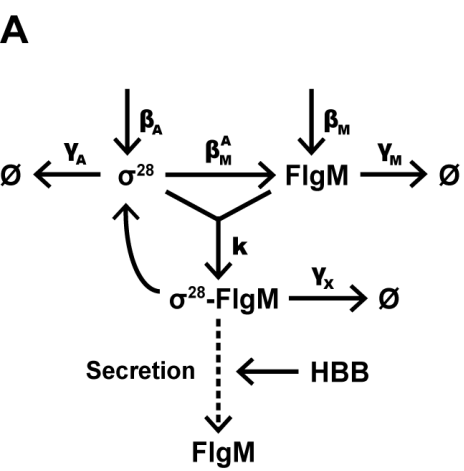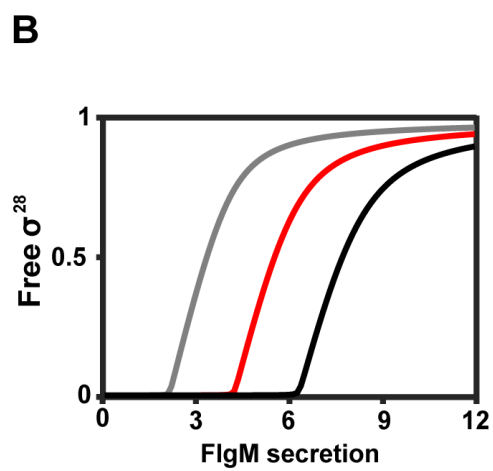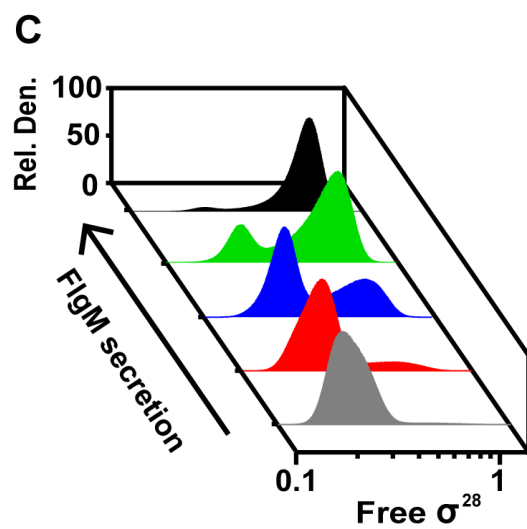

**A**

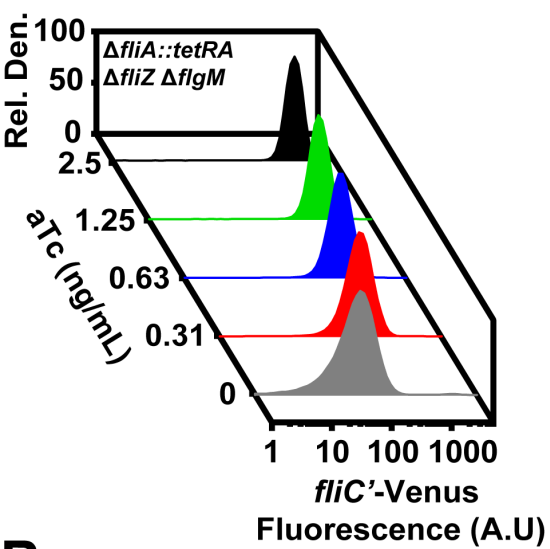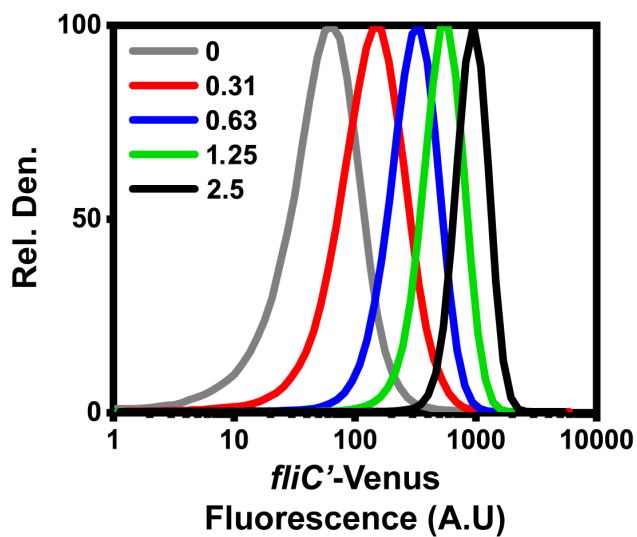

**B**

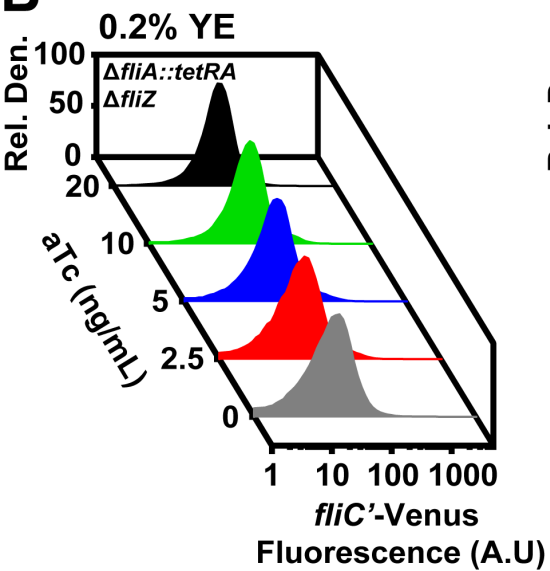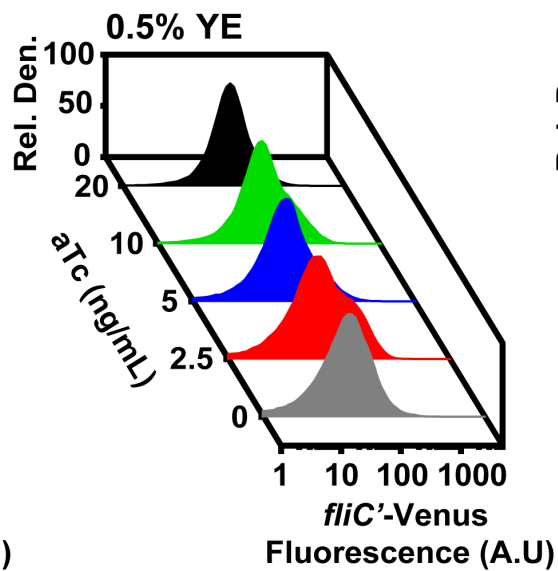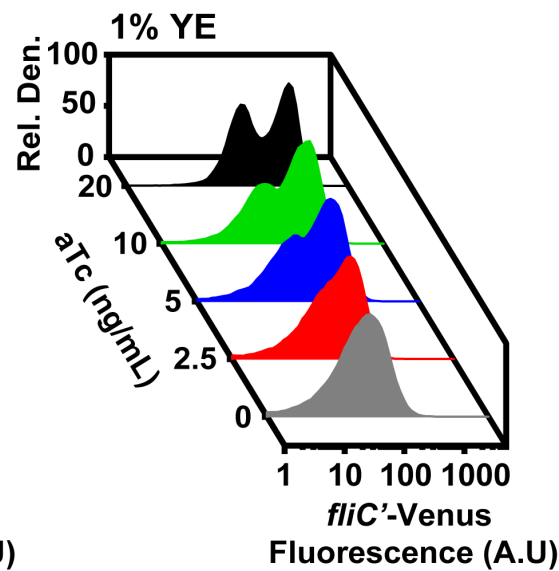

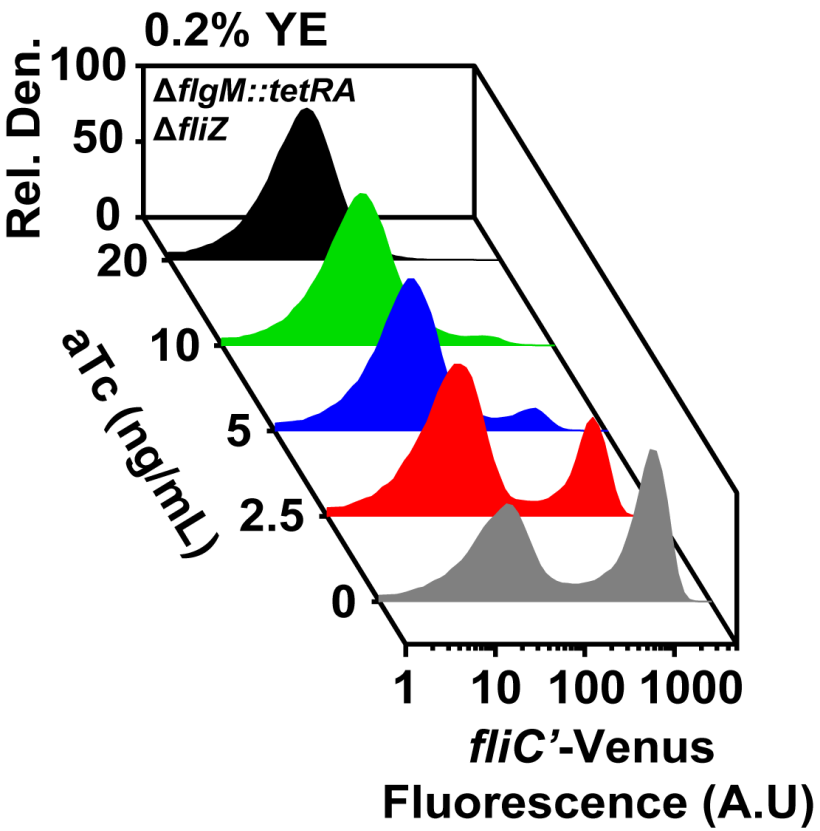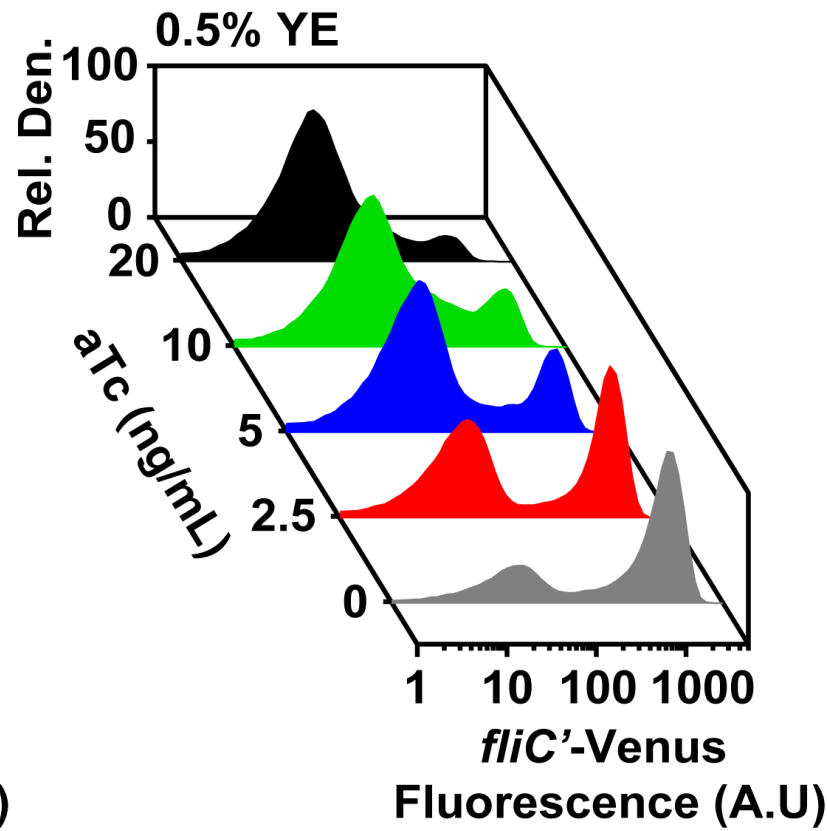

Source: http://biorxiv.org/content/10.1101/2019.12.18.881938v1.full.pdf
